# Supplementary material for: Efficient deformation mechanisms enable invasive cancer cells to migrate faster in 3D collagen networks
Source: PubMed Central journal article supplement (PMC9098560; doi:10.1038/s41598-022-11581-2), 2022-05-12

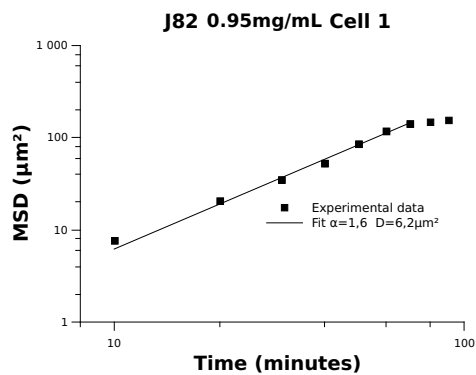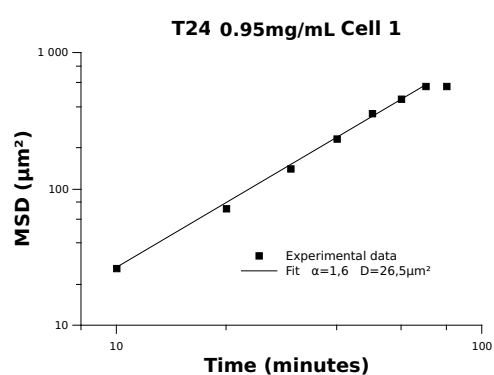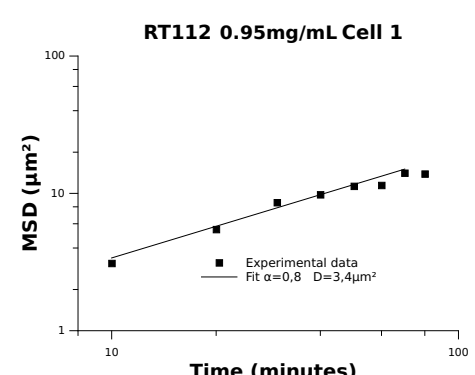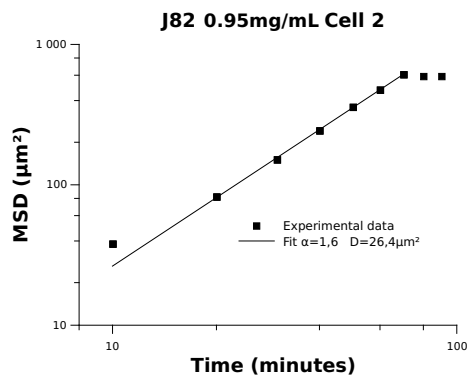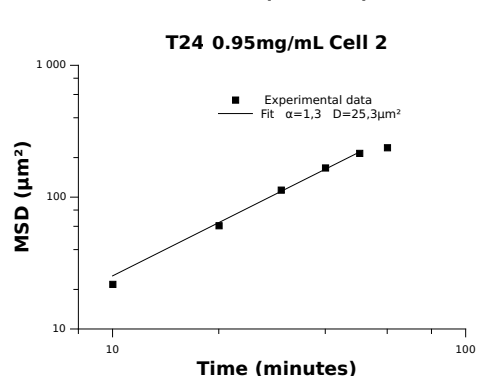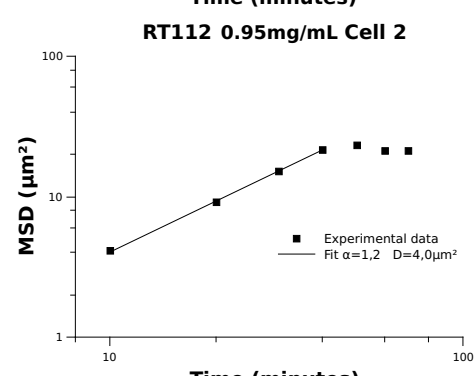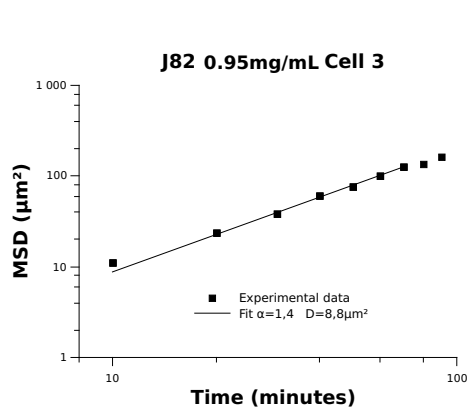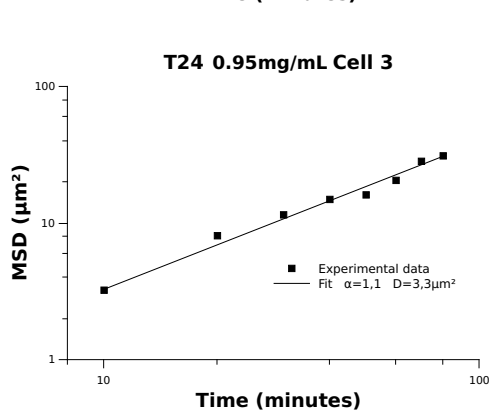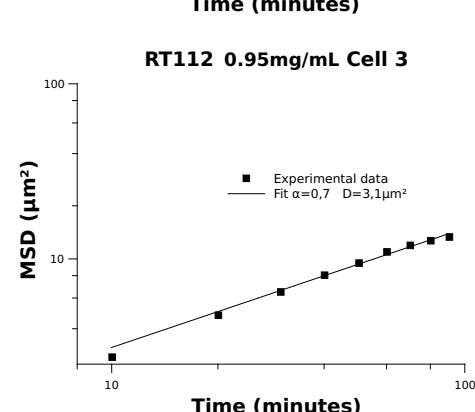

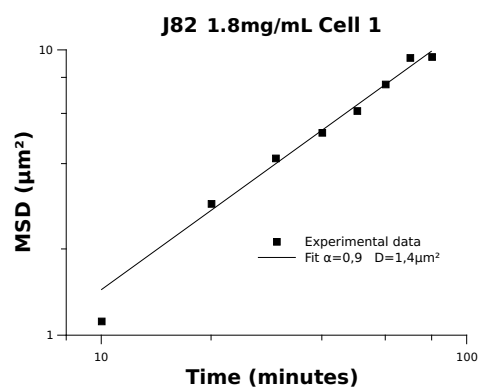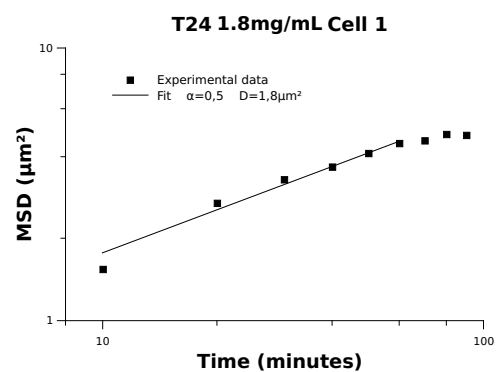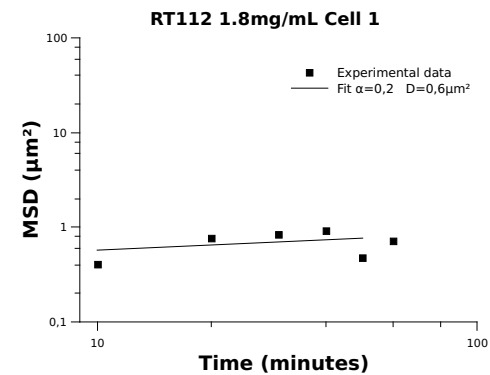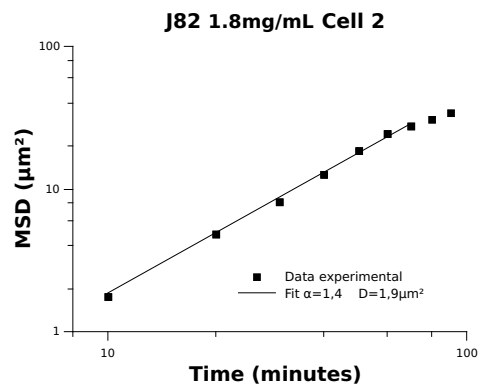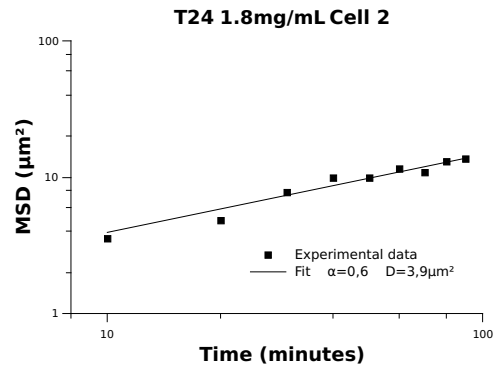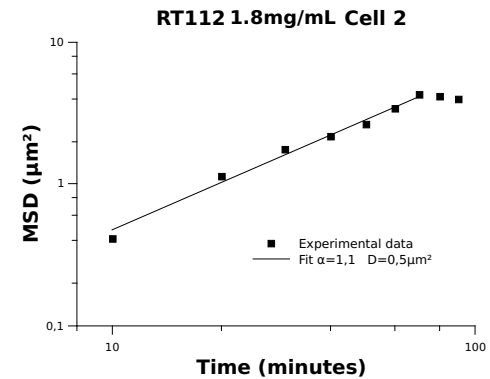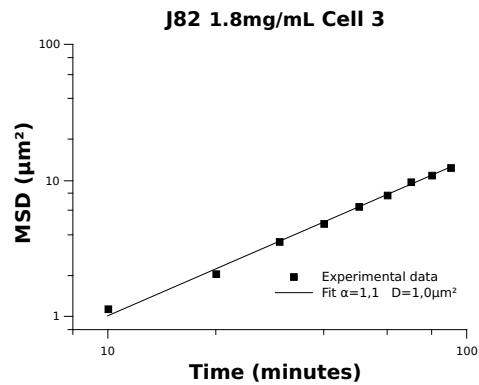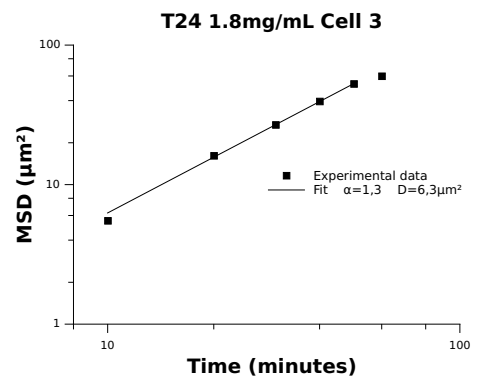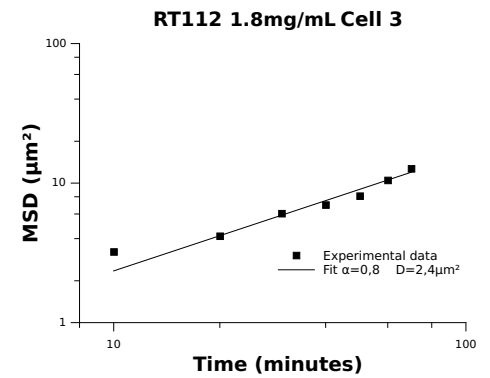

**J82 4.5mg/mL Cell 1**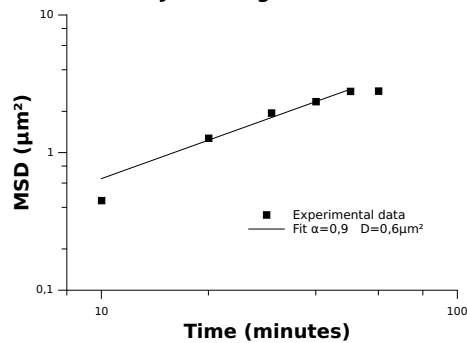**T24 4.5mg/mL Cell 1**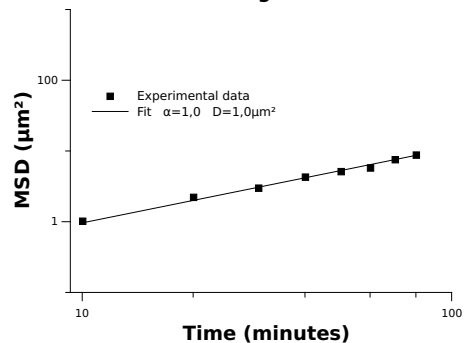**RT112 4.5mg/mL Cell 1**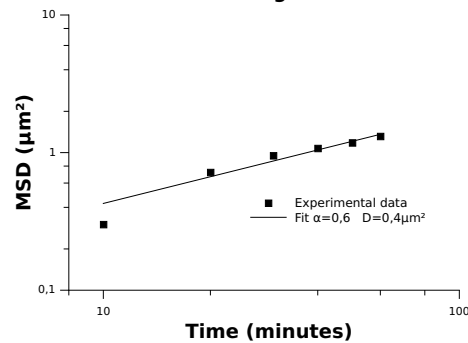**J82 4.5mg/mL Cell 2**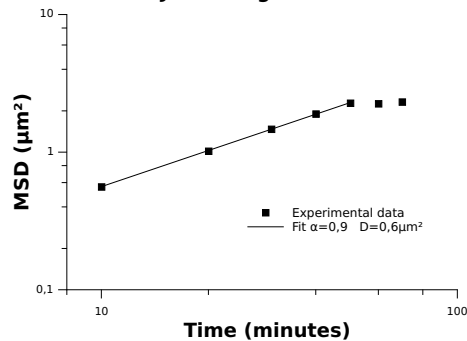**T24 4.5mg/mL Cell 2**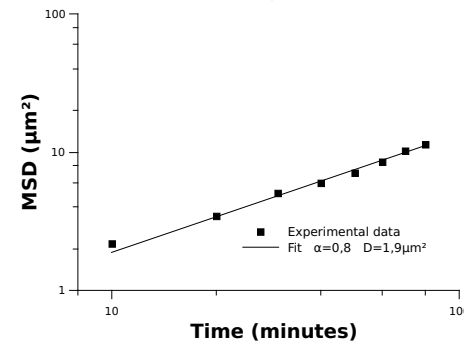**RT112 4.5mg/mL Cell 2**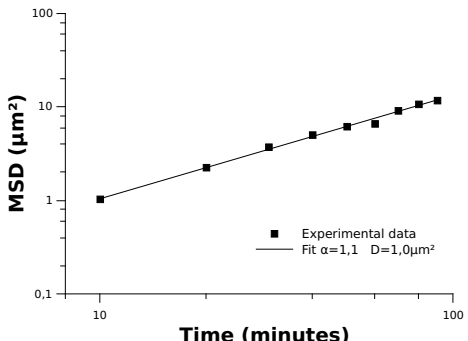**J82 4.5mg/mL Cell 3**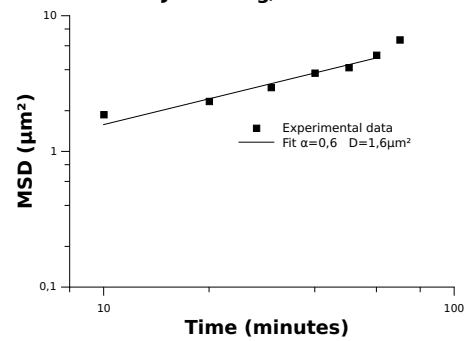**T24 4.5mg/mL Cell 3**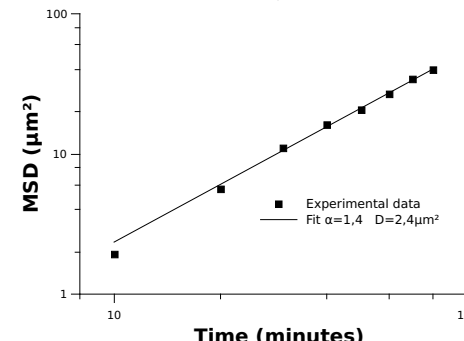**RT112 4.5mg/mL Cell 3**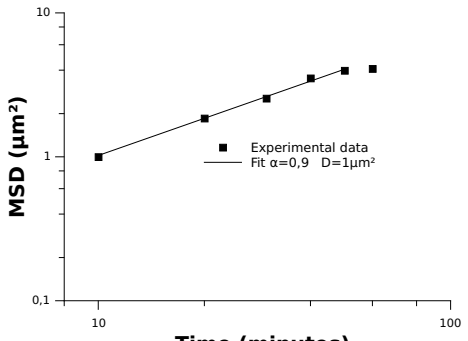

Supplement: 41598_2022_11581_MOESM1_ESM.pdf [file 41598_2022_11581_MOESM1_ESM.pdf]
